# Supplementary material for: A floating 5 μm-diameter needle electrode on the tissue for damage-reduced chronic neuronal recording in mice
Source: Royal Society of Chemistry journal article supplement (doi:10.1039/d1lc01031j), 2022-01-01
Supplement: d1lc01031j1.pdf [file d1lc01031j1.pdf]

## Supporting Information

### **A floating 5- $\mu$ m-diameter needle-electrode on the tissue for damage-reduced chronic neuronal recording in mice**

*Koji Yamashita, Hirohito Sawahata, Shota Yamagiwa, Shohei Yokoyama, Rika Numano, Kowa Koida, and Takeshi Kawano\**

#### **Legend for Movie S1**

##### **Movie S1.**

A proposed surgical procedure with a dissolvable material of PEG for the brain tissue of mice.
